# Supplementary material for: Longitudinal characterization of multispecies microbial populations recovered from spaceflight potable water
Source: PubMed Central journal article supplement (PMC8421509; doi:10.1038/s41522-021-00240-5), 2021-09-06
Supplement: 41522_2021_240_MOESM1_ESM.pdf [file 41522_2021_240_MOESM1_ESM.pdf]

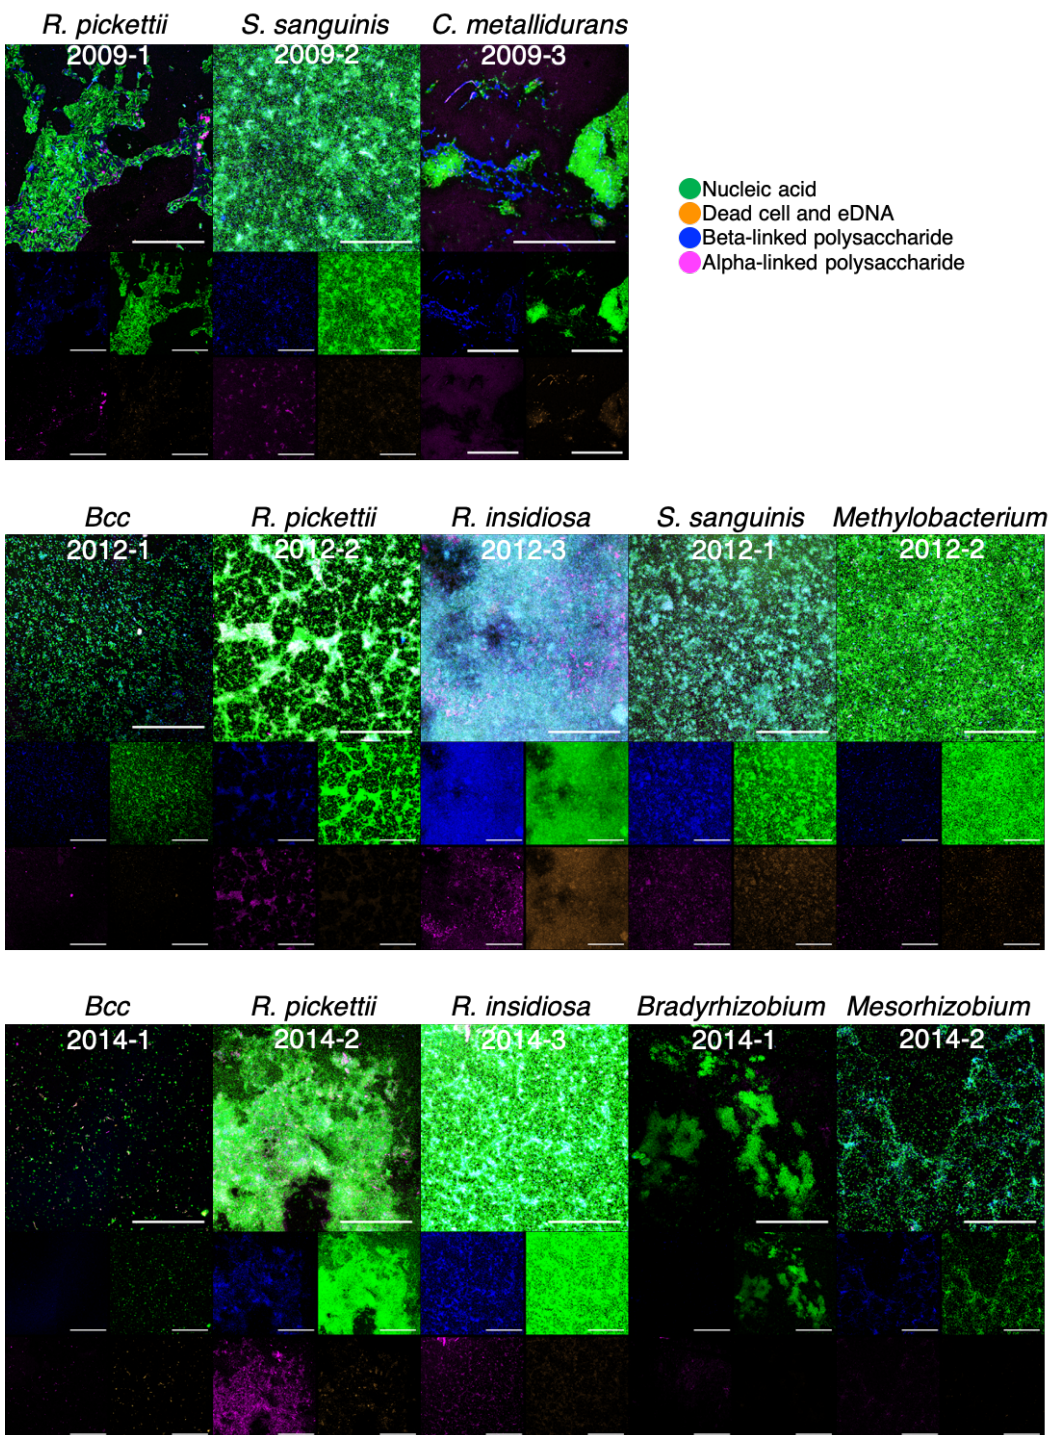

**Supplementary Figure 1. CLSM analysis of static biofilm on glass surface formed by ISS potable water isolates.** Single species biofilms were developed on glass surface statically. Cells and EPS compounds were labeled by fluorescent dyes of SYTO-9 (green), EthHD-2 (orange), CFW (blue channel), and ConA-alexa 633 (magenta) and biofilm structures and composition were observed by CLSM. The details are given in the materials and methods section. Scale bars indicate 100  $\mu$ m. The number below each image indicates different isolates.

## Growth

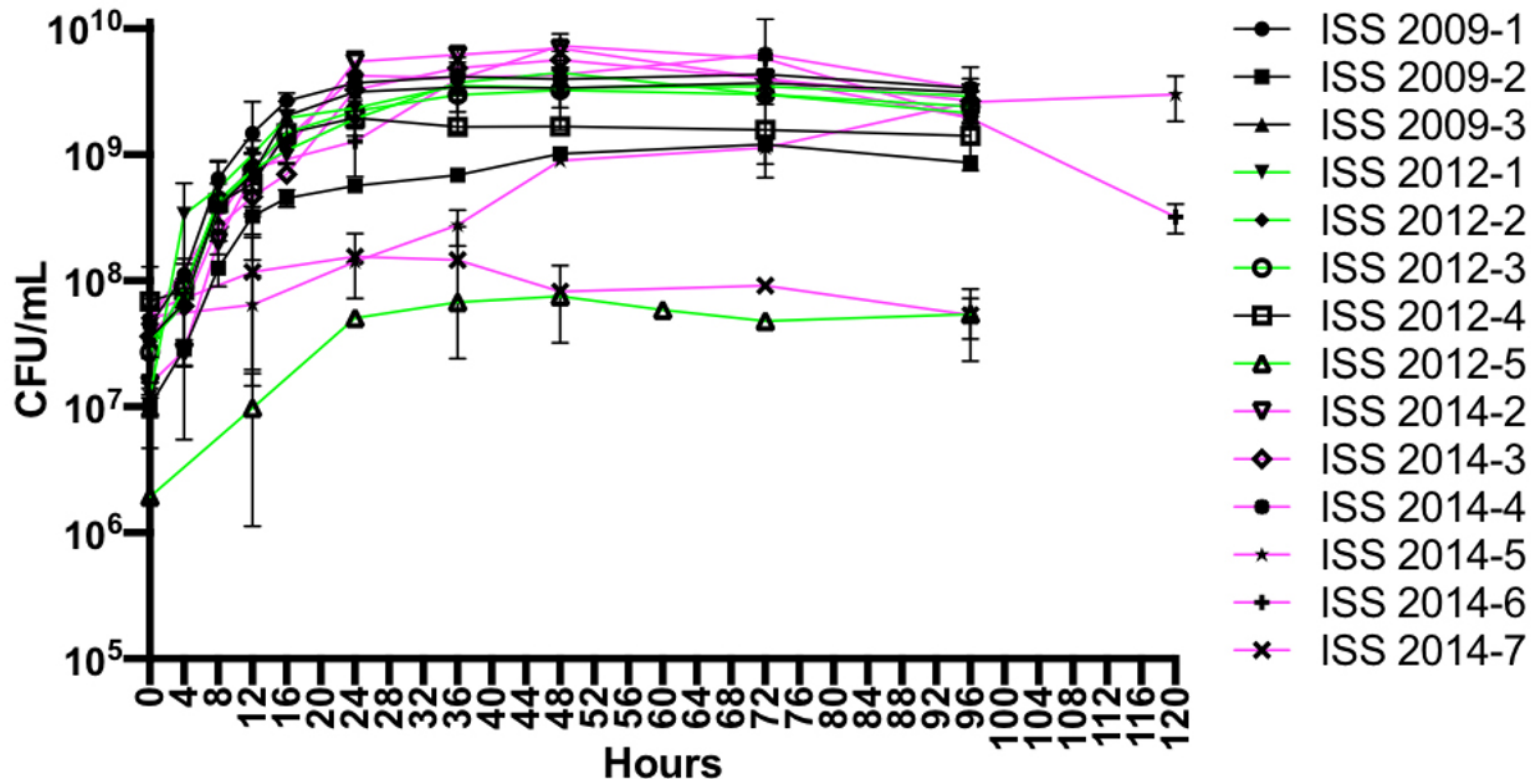

**Supplementary Figure 2. Growth curve of individual ISS potable water isolates.** Individual strains were cultured in 5mL Reasoner's 2A (R2A) liquid medium in sterile polypropylene snap cap tubes at room temperature and shaken at 130 rpm. The growth was monitored for 96 or 120 hours by determining the CFU/mL on nonselective R2A medium. Experiments were done a minimum of 3 times. The mean value and standard deviation error bars are shown for each time point.

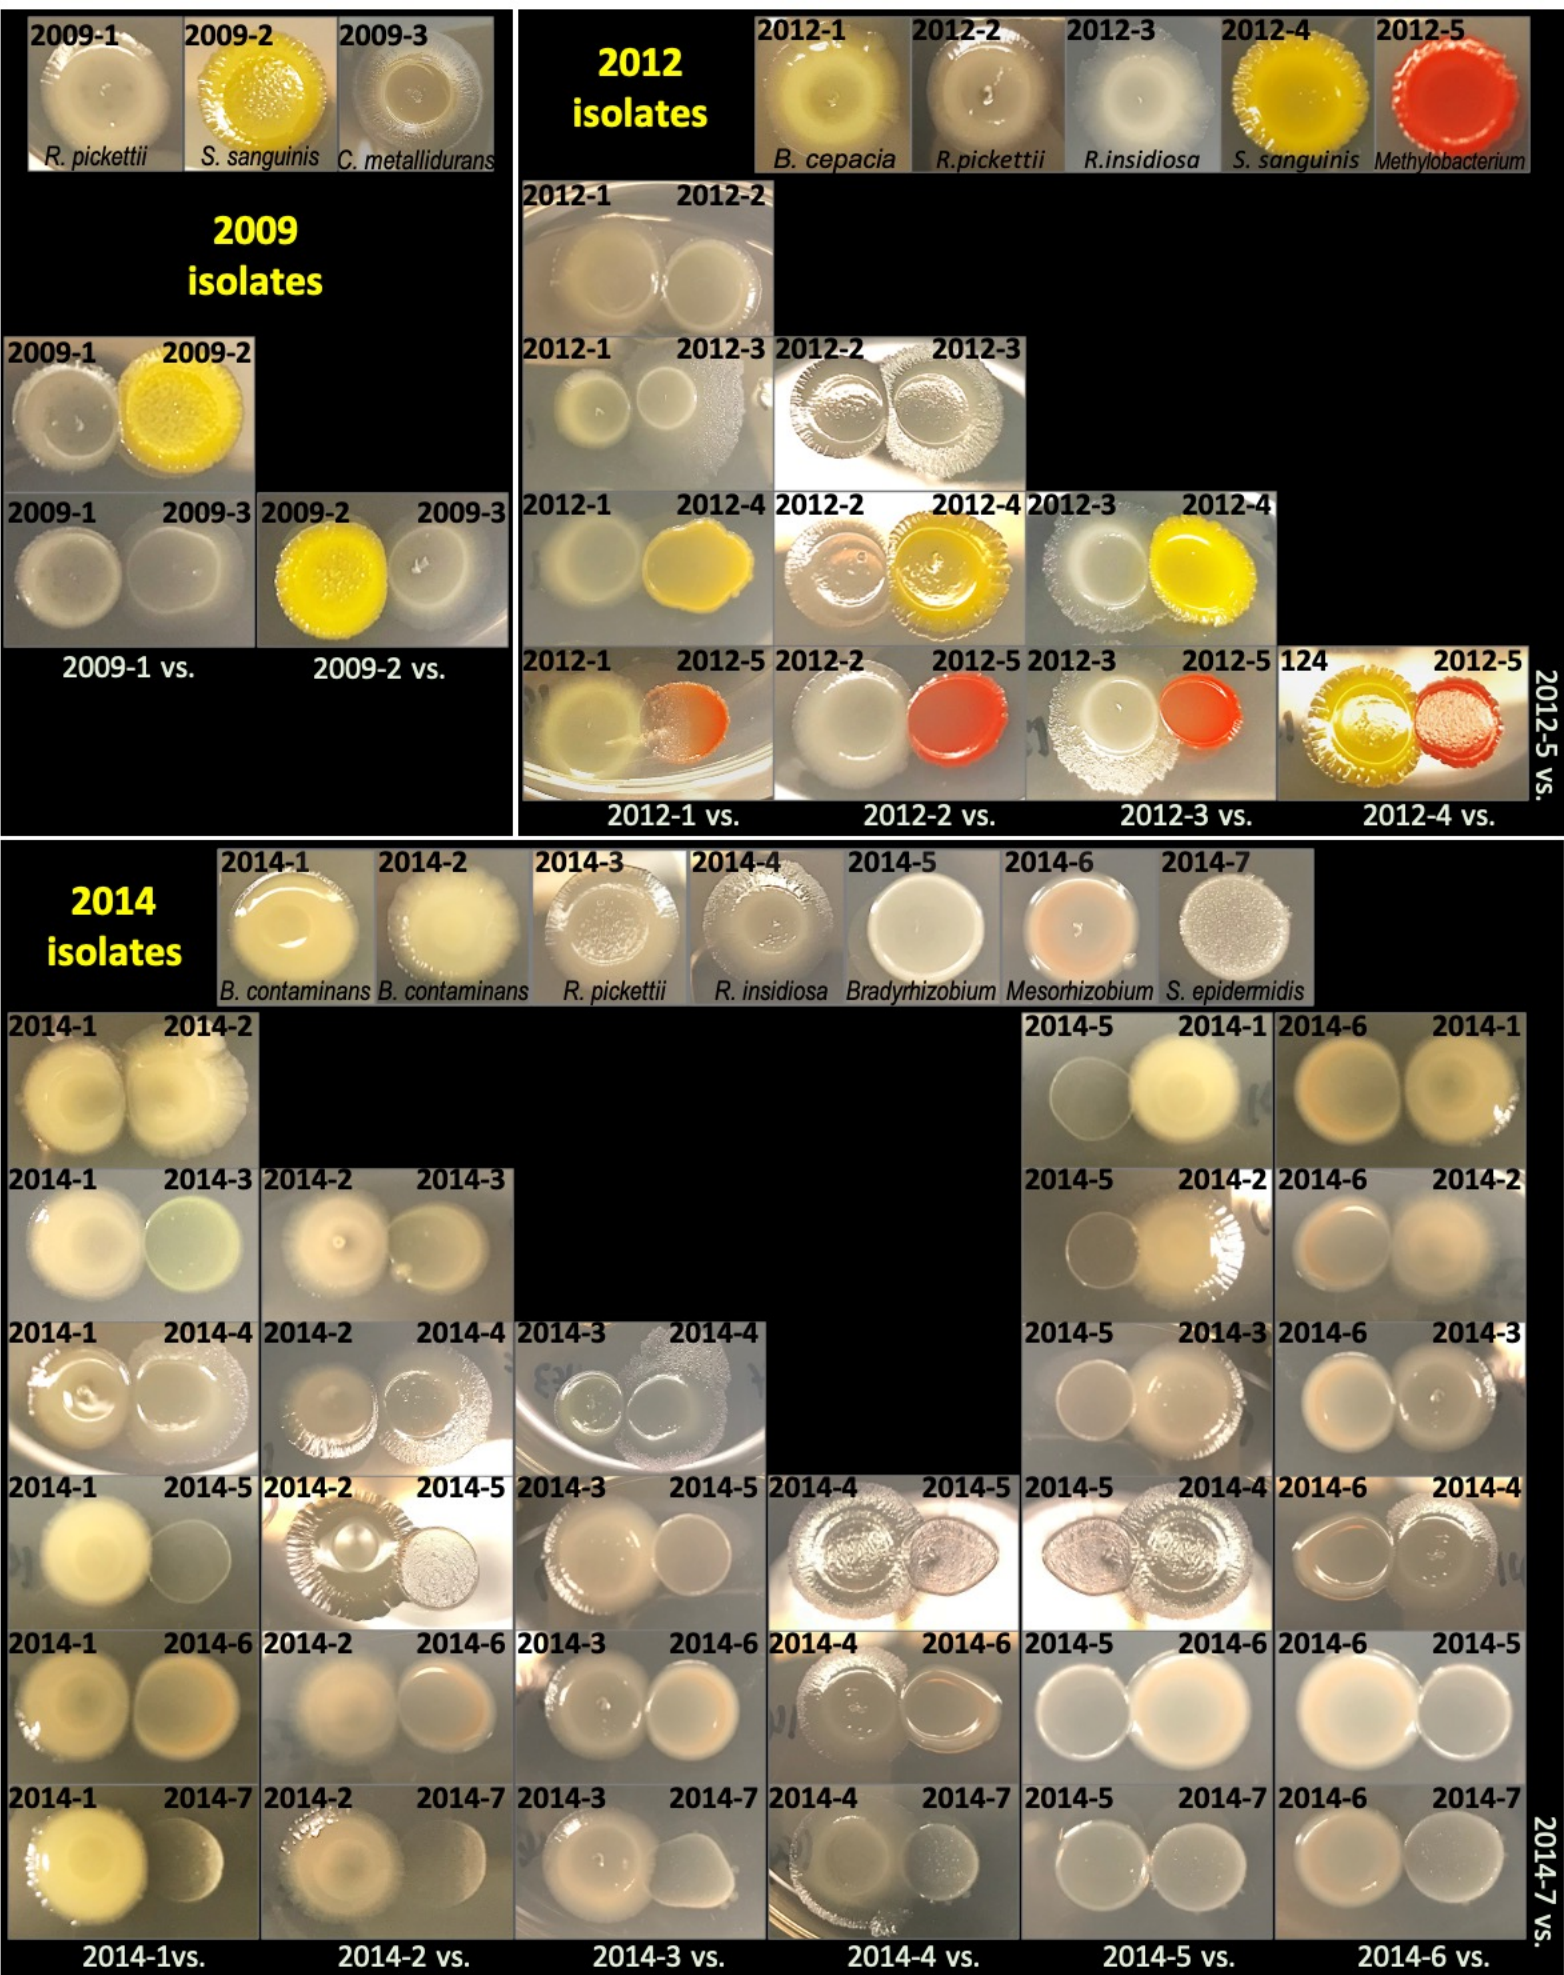

**Supplementary Fig. 3. Interspecies interaction between ISS potable water isolates.** High density colony morphology of individual strains and interactive colony morphological phenotypes with every possible combination within the same year group. The interspecies interaction was monitored for about 10 days. The assay was repeated 2-3 times.

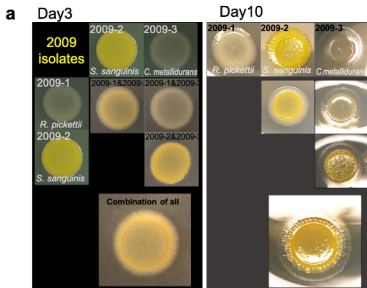

Example matrix

| Strains | B     | C     | D     |
|---------|-------|-------|-------|
| A       | A + B | A + C | A + D |
| B       |       | B + C | B + D |

**Supplementary Figure 4. Mixed-species colony biofilms.** Colony biofilm morphologies of pure and mixed-species. Isolates shown in the top row were mixed with those shown in the left column, as shown in the example matrix.

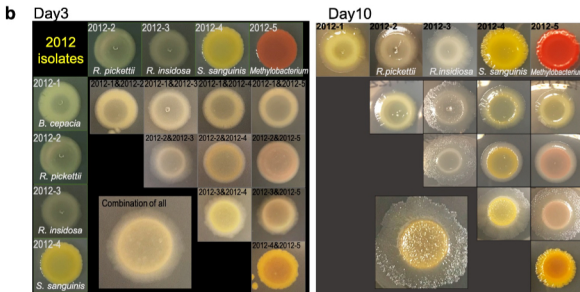

**a** 2009 isolates, **b** 2012 isolates, **c** 2014 isolates. See **Table 1** for strain identification.

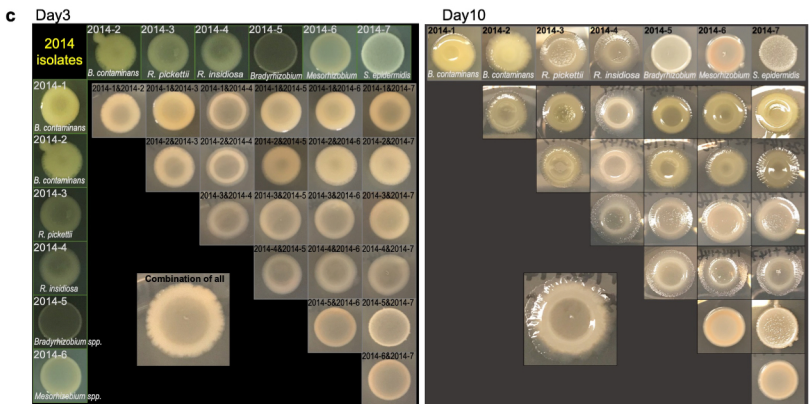

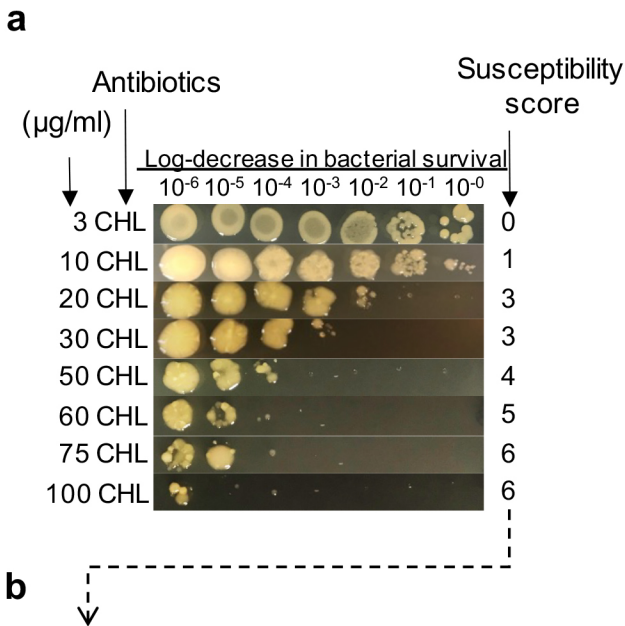

**b**

| Susceptibility score | CLSI determination | Decrease in CFU (approximately) |
|----------------------|--------------------|---------------------------------|
| 0                    | Resistant (R)      | $10^0$                          |
| 1                    | Resistant (R)      | $10^1$                          |
| 2                    | Resistant (R)      | $10^2$                          |
| 3                    | Intermediate (I)   | $10^3$                          |
| 4                    | Intermediate (I)   | $10^4$                          |
| 5                    | Intermediate (I)   | $10^5$                          |
| 6                    | Susceptible (S)    | $10^6$                          |
| 7                    | Susceptible (S)    | $10^7$                          |

**Supplementary Figure. 5. Antimicrobial resistance of pure cultures of ISS potable water isolates. a** Antimicrobial susceptibility testing and scoring. CHL indicates chloramphenicol. **b** The susceptibility scoring and CLSI determination.

**Supplemental Table 1. Microbial isolates from US water system in ISS listed in the NASA archive.** The number of different genera does not include the unidentified Gram negative rods.

| Microbial Identification            | Domain   | Phylum         | Class               | Order              | Family              | The number of isolates |
|-------------------------------------|----------|----------------|---------------------|--------------------|---------------------|------------------------|
| <i>Acinetobacter spp.</i>           | Bacteria | Proteobacteria | Gammaproteobacteria | Pseudomonadales    | Moraxellaceae       | 1                      |
| <i>Burkholderia spp.</i>            | Bacteria | Proteobacteria | Betaproteobacteria  | Burkholderiales    | Burkholderiaceae    | 24                     |
| <i>Bradyrhizobium spp.</i>          | Bacteria | Proteobacteria | Alphaproteobacteria | Rhizobiales        | Bradyrhizobiaceae   | 1                      |
| <i>Chitinophaga spp.</i>            | Bacteria | Bacteroidetes  | Sphingobacteria     | Sphingobacteriales | Chitinophagaceae    | 2                      |
| <i>Chryseobacterium gleum</i>       | Bacteria | Bacteroidetes  | Flavobacteria       | Flavobacteriales   | Flavobacteriaceae   | 2                      |
| <i>Cryptococcus laurentii</i>       | Fungi    | Basidiomycota  | Tremellomycetes     | Tremellales        | Tremellaceae        | 3                      |
| <i>Cupriavidus metallidurans</i>    | Bacteria | Proteobacteria | Betaproteobacteria  | Burkholderiales    | Burkholderiaceae    | 4                      |
| <i>Curvibacter spp.</i>             | Bacteria | Proteobacteria | Betaproteobacteria  | Burkholderiales    | Comamonadaceae      | 1                      |
| <i>Leifsonia spp.</i>               | Bacteria | Actinobacteria | Actinobacteria      | Actinomycetales    | Microbacteriaceae   | 1                      |
| <i>Mesorhizobium spp.</i>           | Bacteria | Proteobacteria | Alphaproteobacteria | Rhizobiales        | Phyllobacteriaceae  | 10                     |
| <i>Methylobacterium spp.</i>        | Bacteria | Proteobacteria | Alphaproteobacteria | Rhizobiales        | Methylobacteriaceae | 4                      |
| <i>Pelomonas spp.</i>               | Bacteria | Proteobacteria | Betaproteobacteria  | Burkholderiales    | Comamonadaceae      | 2                      |
| <i>Phyllobacterium spp.</i>         | Bacteria | Proteobacteria | Alphaproteobacteria | Rhizobiales        | Phyllobacteriaceae  | 1                      |
| <i>Ralstonia spp.</i>               | Bacteria | Proteobacteria | Betaproteobacteria  | Burkholderiales    | Burkholderiaceae    | 43                     |
| <i>Sphingobium yanoikuyae</i>       | Bacteria | Proteobacteria | Alphaproteobacteria | Sphingomonadales   | Sphingomonadaceae   | 1                      |
| <i>Sphingomonas spp.</i>            | Bacteria | Proteobacteria | Alphaproteobacteria | Sphingomonadales   | Sphingomonadaceae   | 8                      |
| <i>Staphylococcus epidermidis</i>   | Bacteria | Firmicutes     | Bacilli             | Bacillales         | Staphylococcaceae   | 4                      |
| Unidentified Gram-negative rod      |          |                |                     |                    |                     | 5                      |
| The No. of of different species     |          |                |                     |                    |                     | 17                     |
| The total No. of ISS water isolates |          |                |                     |                    |                     | 117                    |

**Supplementary Table 2. ISS water isolates from 2009 to 2015**

|                                   | <b>2009</b> | <b>2010</b> | <b>2011</b> | <b>2012</b> | <b>2013</b> | <b>2014</b> | <b>2015</b> |
|-----------------------------------|-------------|-------------|-------------|-------------|-------------|-------------|-------------|
| No. of spp. (a)                   | 3           | 5           | 8           | 8           | 12          | 8           | 3           |
| No. of isolates (b)               | 10          | 22          | 17          | 16          | 18          | 22          | 8           |
| <b>Diversity score (a/b x100)</b> | 30.00       | 22.73       | 47.06       | 50.00       | 66.67       | 36.36       | 37.50       |
| <i>Ralstonia (R) spp. (%)</i>     | 80.00       | 40.91       | 29.41       | 31.25       | 33.33       | 13.64       | 87.50       |
| <i>Burkholderia (B) spp. (%)</i>  | 0.00        | 40.91       | 17.65       | 31.25       | 5.56        | 27.27       | 0.00        |
| <i>Sphingomonas spp. (%)</i>      | 10.00       | 9.09        | 11.76       | 6.25        | 11.11       | 0.00        | 0.00        |
| <i>Methylobacterium spp. (%)</i>  | 0.00        | 0.00        | 11.76       | 12.50       | 0.00        | 0.00        | 0.00        |
| <b>R + B (%)</b>                  | 80.00       | 81.82       | 47.06       | 62.50       | 38.89       | 40.91       | 87.50       |

**Supplementary Table 3. Metabolic profiling of the 2014 beta-hemolytic Bcc strain.**

Bacterial colonies were tested for biochemical characteristics using a VITEK system for Gram-negative bacteria.

| Mnemonic | Test                            | Results |
|----------|---------------------------------|---------|
| APPA     | Ala-Phe-Pro-ARYLAMIDASE         | -       |
| ADO      | ADONITOL                        | +       |
| PyrA     | L-Pyrrolydonyl-ARYLAMIDASE      | -       |
| IARL     | L-ARABITOL                      | +       |
| dCEL     | D-CELLOBIOSE                    | +       |
| BGAL     | BETA-GALACTOSIDASE              | +       |
| H2S      | H2S PRODUCTION                  | -       |
| BNAG     | BETA-N-ACETYL-GLUCOSAMINIDASE   | +       |
| AGLtp    | Glutamyl Arylamidase pNA        | -       |
| dGLU     | D-GLUCOSE                       | +       |
| GGT      | GAMMA-GLUTAMYL-TRANSFERASE      | +       |
| OFF      | FERMENTATION/ GLUCOSE           | -       |
| BGLU     | BETA-GLUCOSIDASE                | -       |
| dMAL     | D-MALTOSE                       | +       |
| dMAN     | D-MANNITOL                      | +       |
| dMNE     | D-MANNOSE                       | +       |
| BXYL     | BETA-XYLOSIDASE                 | -       |
| BAlap    | BETA-Alanine arylamidase pNA    | +       |
| ProA     | L-Proline ARYLAMIDASE           | +       |
| LIP      | LIPASE                          | -       |
| PLE      | PALATINOSE                      | -       |
| TyrA     | Tyrosine ARYLAMIDASE            | +       |
| URE      | UREASE                          | +       |
| dSOR     | D-SORBITOL                      | +       |
| SAC      | SACCHAROSE/SUCROSE              | +       |
| dTAG     | D-TAGATOSE                      | -       |
| dTRE     | D-TREHALOSE                     | +       |
| CIT      | CITRATE (SODIUM)                | +       |
| MNT      | MALONATE                        | +       |
| 5KG      | 5-KETO-D-GLUCONATE              | -       |
| ILATk    | L-LACTATE alkalinisation        | +       |
| AGLU     | ALPHA-GLUCOSIDASE               | -       |
| SUCT     | SUCCINATE alkalinisation        | +       |
| NAGA     | Beta-N-ACETYL-GALACTOSAMINIDASE | +       |
| AGAL     | ALPHA-GALACTOSIDASE             | -       |
| PHOS     | PHOSPHATASE                     | +       |
| GlyA     | Glycine ARYLAMIDASE             | -       |
| ODC      | ORNITHINE DECARBOXYLASE         | -       |



|       |                                 |   |
|-------|---------------------------------|---|
| LDC   | LYSINE DECARBOXYLASE            | - |
| ODEC  | DECARBOXYLASE BASE              |   |
| IHISa | L-HISTIDINE assimilation        | - |
| CMT   | COURMARATE                      | + |
| BGUR  | BETA-GLUCORONIDASE              | - |
| O129R | O/129 RESISTANCE (comp.vibrio.) | - |
| GGAA  | Glu-Gly-Arg-ARYLAMIDASE         | - |
| IMLTa | L-MALATE assimilation           | - |
| ELLM  | ELLMAN                          | - |
| ILATa | L-LACTATE assimilation          | + |
